# Supplementary material for: Lactational delivery of Triclosan promotes non-alcoholic fatty liver disease in newborn mice
Source: PubMed Central journal article supplement (PMC9329322; doi:10.1038/s41467-022-31947-4), 2022-07-27
Supplement: 41467_2022_31947_MOESM1_ESM.pdf [file 41467_2022_31947_MOESM1_ESM.pdf]

## SUPPLEMENTARY DATA

### **Lactational delivery of Triclosan promotes non-alcoholic fatty liver disease in newborn mice**

André A. Weber<sup>1</sup>, Xiaojing Yang<sup>1</sup>, Elvira Mennillo<sup>1</sup>, Jeffrey Ding<sup>2</sup>, Jeramie D. Watrous<sup>2</sup>, Mohit Jain<sup>2</sup>, Shujuan Chen<sup>1</sup>, Michael Karin<sup>3</sup>, Robert H. Tukey<sup>1,\*</sup>.

Short Title: *Triclosan drives neonatal NAFLD*

<sup>1</sup>Laboratory of Environmental Toxicology, Department of Pharmacology, University of California, San Diego, La Jolla, CA 92093, USA.

<sup>2</sup>Departments of Medicine and Pharmacology, University of California, San Diego, La Jolla, CA 92093, USA.

<sup>3</sup>Laboratory of Gene Regulation and Signal Transduction, Department of Pharmacology, University of California, San Diego, La Jolla, CA 92093.

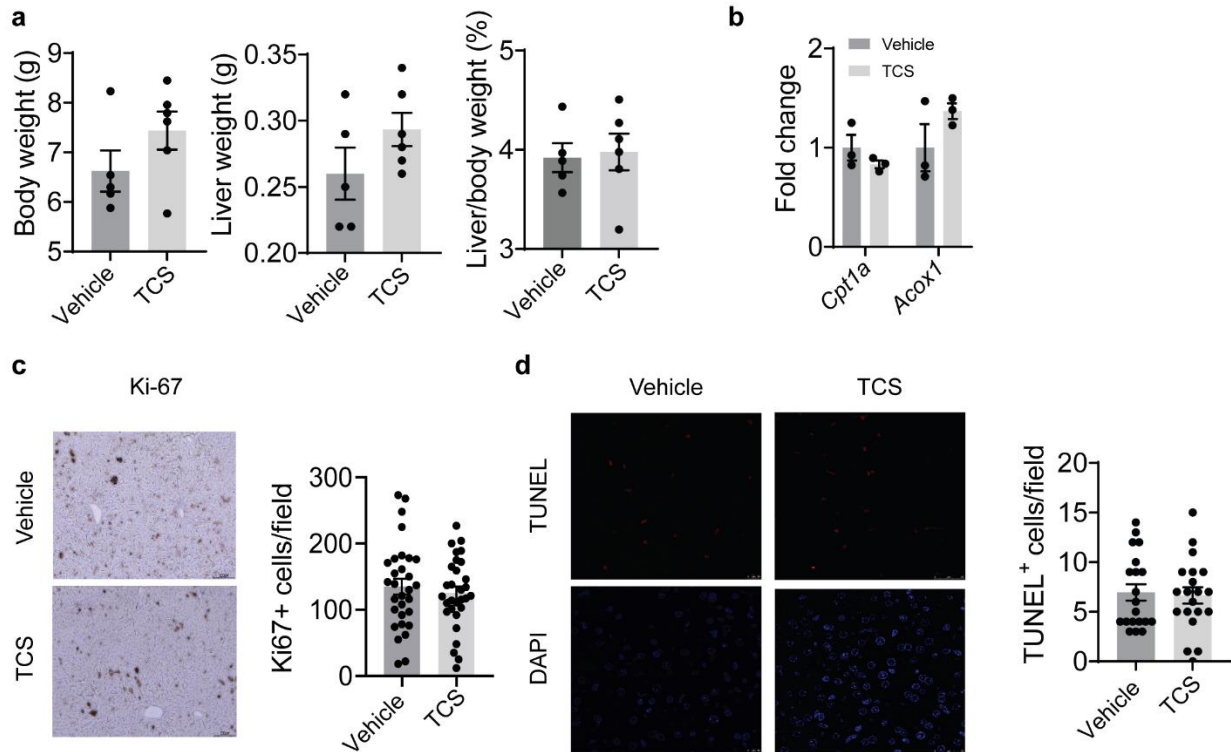

**Figure S1. TCS has no effect on body and liver weight and hepatic proliferation and cell death.** WT mice breastfed with vehicle or TCS for 21-days-old. **a**, Body weight, liver weight and Liver/Body Weight ratio (%) (n=5-6 mice per group). **b**, Expression of genes associated with fatty acid oxidation *Cpt1a* and *Acox1* (n=3 mice per group). **c**, Hepatocyte's proliferation was determined by Ki-67 immunostaining and quantitation of positive cells (n=30 images/5 mice per group). **d**, Liver cell apoptosis was determined by TUNEL staining and quantitation of positive cells (n=20 images/5 mice per group). Scale bars: **c**, 200 $\mu$ m and **d**, 20 $\mu$ m. **a-d** show mean  $\pm$  S.E., determined by two-tailed Student's test.

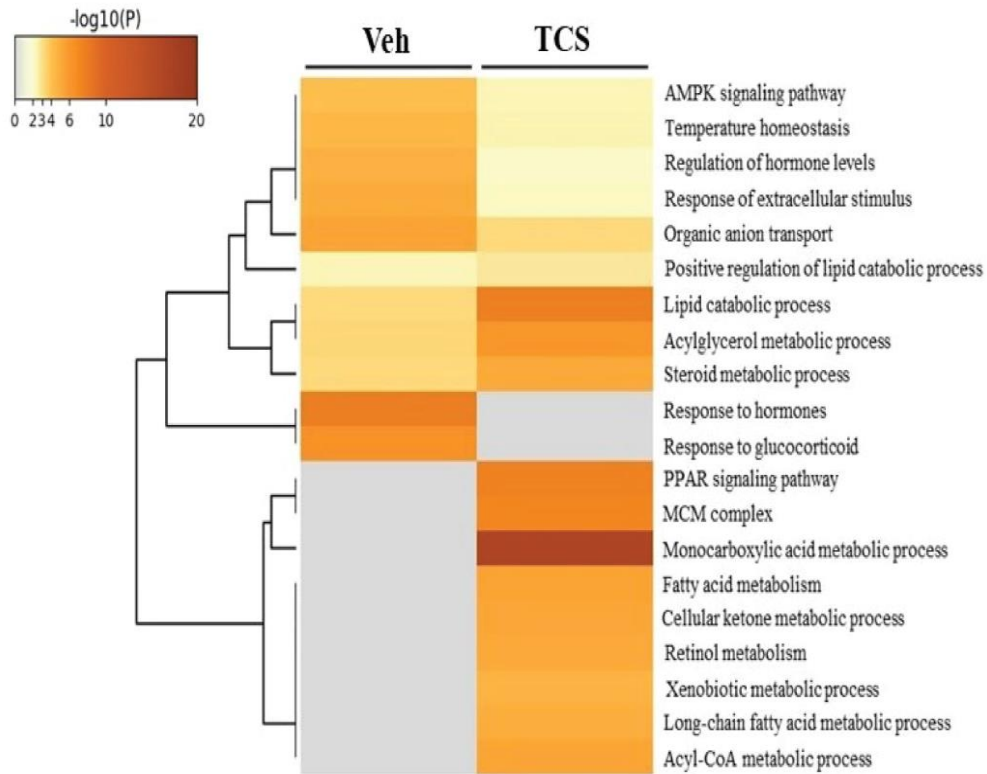

**Figure S2. TCS-induced alterations in the liver transcriptome.** WT mice breastfed with vehicle or TCS for 21-days-old. Heatmap depicting expression of HCC-related genes in liver tissue of neonatal mice treated with vehicle or TCS (n=3 mice per group). All genes showed in this figure had a  $p$ -adjusted value above 0.05, showing no differences between groups.

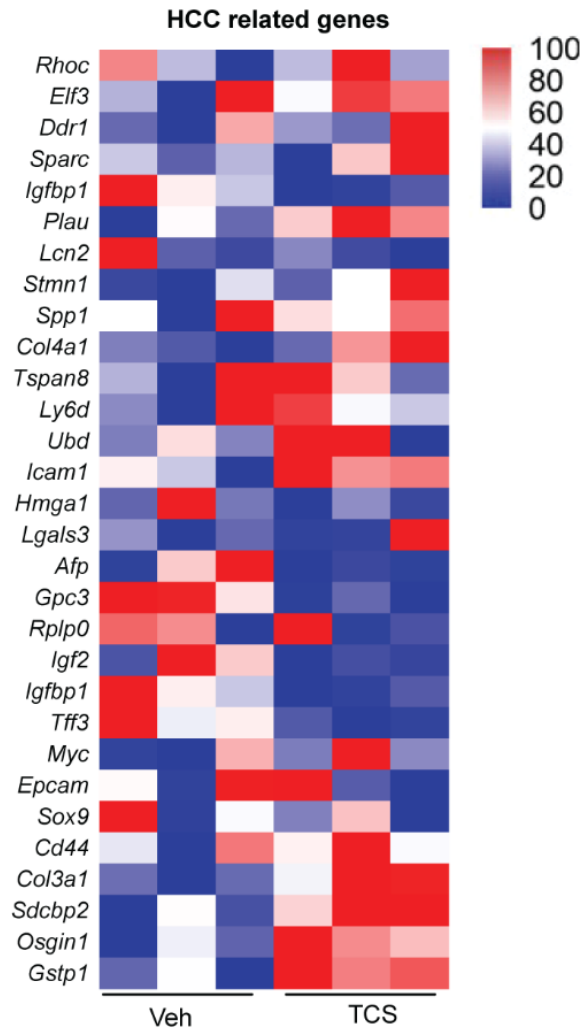

**Figure S3. TCS has little effect on HCC-related genes expression.** WT mice breastfed with vehicle or TCS for 21-days-old. Heatmap depicting expression of HCC-related genes in liver tissue of neonatal mice treated with vehicle or TCS (n=3 mice per group). All genes showed in this figure had a *p*-adjusted value above 0.05, showing no differences between groups.

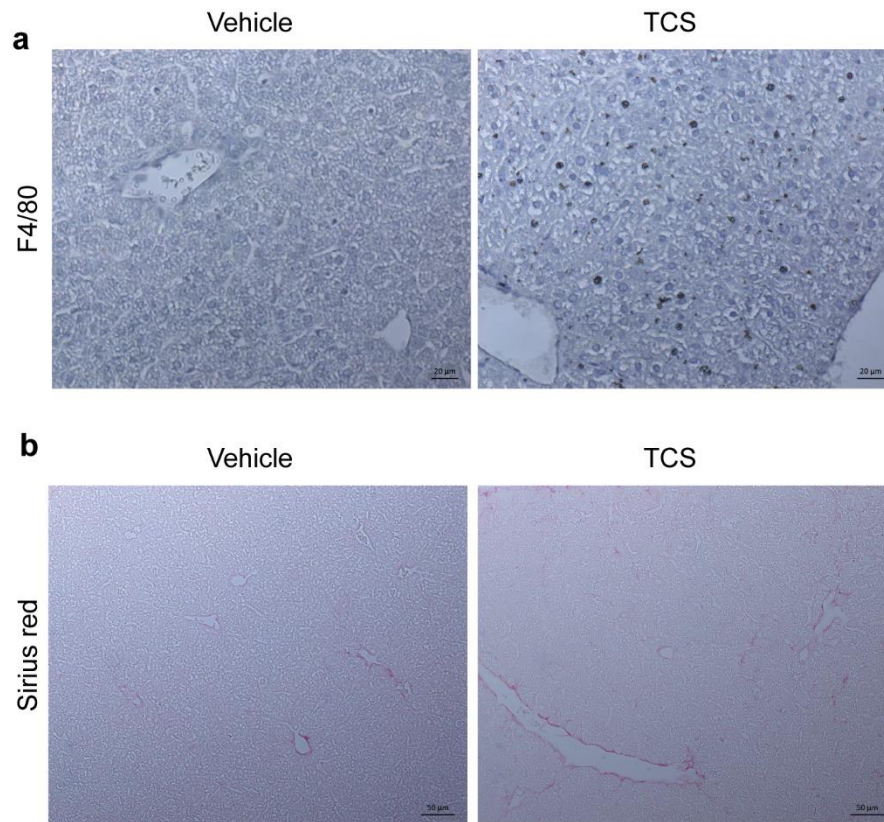

**Figure S4. TCS increases immune infiltration and fibrosis.** WT mice breastfed with vehicle or TCS milk for 21-days-old. **a**, IHC of formalin-fixed paraffin-embedded liver sections from vehicle and TCS group F4/80 immunostaining show macrophage infiltration (n=4 mice per group). **b**, Frozen sections were stained by Sirius Red to visualize collagen deposition (n=4 mice per group). Scale bars: **a**, 20µm and **b**, 50µm.

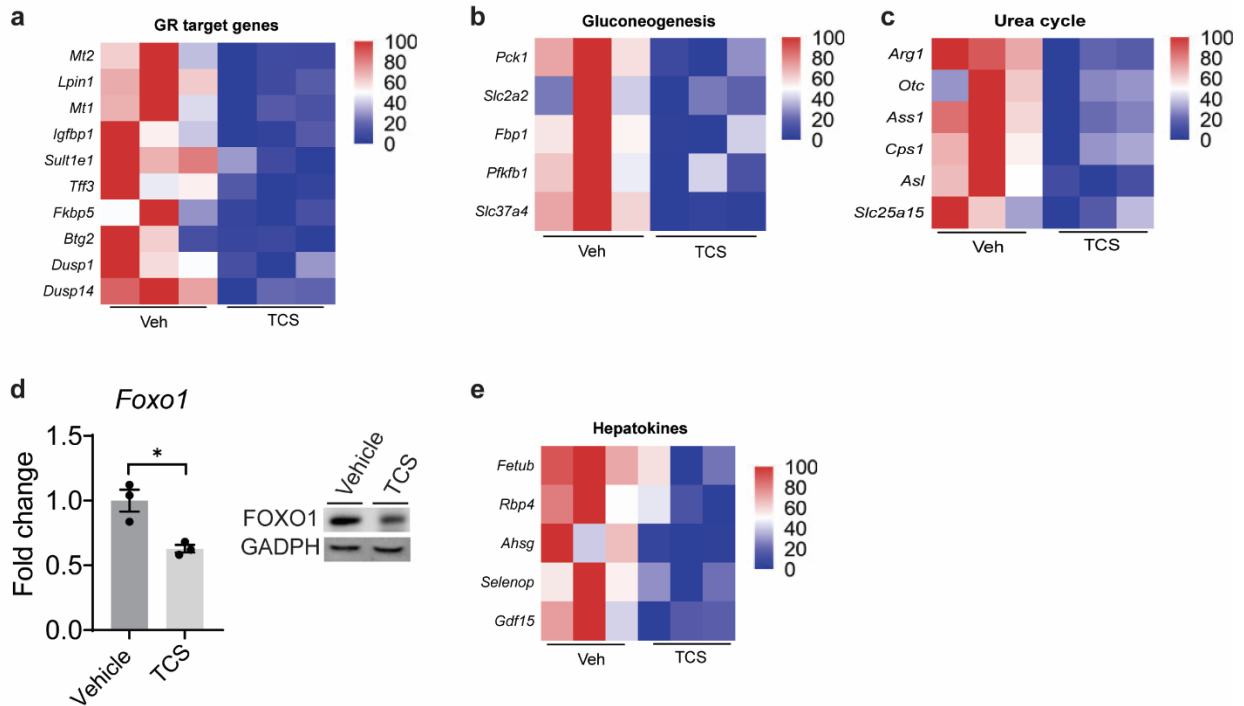

**Figure S5. TCS downregulates glucocorticoid receptor and downstream pathways.** WT mice breastfed with vehicle or TCS for 21-days-old. **a-c** Heatmaps showing differential expression of genes associated with glucocorticoid receptor (GR) signaling (**a**), and genes associated with downstream GR pathways, gluconeogenesis (**b**) and urea cycle (**c**) (n=3 per group). **d**, gene expression and representative IB image of FOXO1 in liver. **e**, Heatmap showing differential expression of hepatokines in liver (n=3 per group). **d** show mean  $\pm$  S.E., determined by two-tailed Student's test; \* $P < 0.05$ . All genes used are significant and p adjusted value below the cut-off level of 0.05.

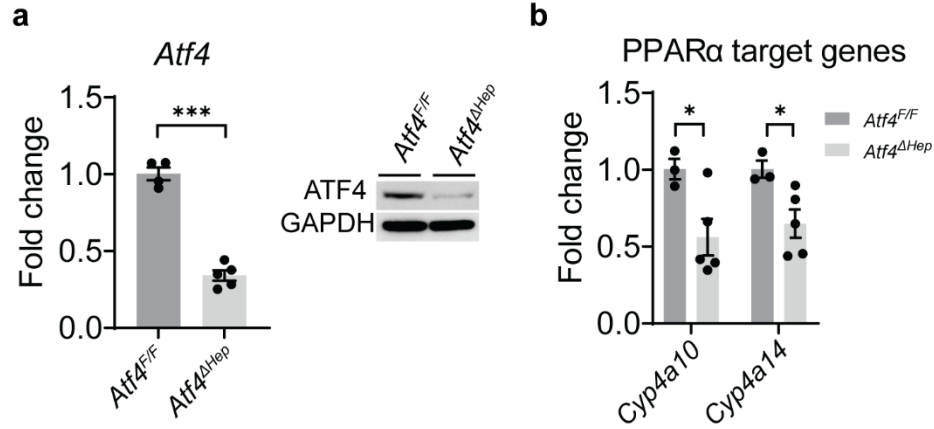

**Figure S6.** Downstream **PPAR $\alpha$**  target genes are downregulated in ***Atf4<sup>ΔHep</sup>*** mice treated with **TCS**. *Atf4<sup>F/F</sup>* and *Atf4<sup>ΔHep</sup>* mice breastfed with TCS milk 21-days-old. **a**, Hepatic expression of ATF4 gene in both *Atf4<sup>F/F</sup>* and *Atf4<sup>ΔHep</sup>* livers and IB of ATF4 (n=4-5 mice per group). **b**, Hepatic expression of downstream PPAR $\alpha$  target genes in *Atf4<sup>F/F</sup>* and *Atf4<sup>ΔHep</sup>* (n=3-5 mice per group). **a**, **b** show mean  $\pm$  S.E., determined by two-tailed Student's test; \*P<0.05, \*\*\*P<0.001.

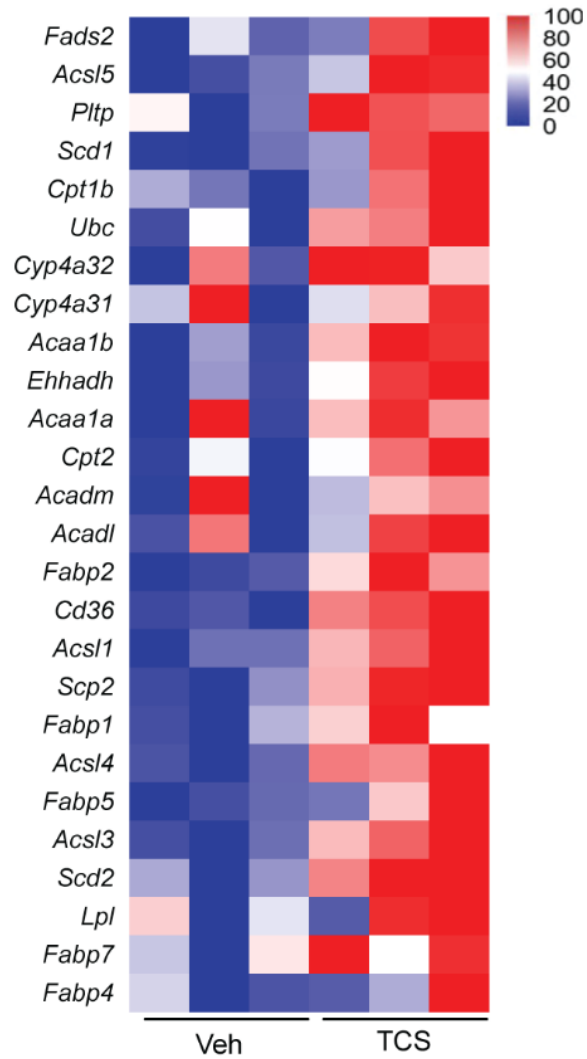

**Figure S7. TCS has strong effect on PPAR $\alpha$  target genes.** WT mice breastfed with vehicle or TCS for 21-days-old. Heatmap depicting expression of downstream PPAR $\alpha$  target genes in liver tissue of neonatal mice treated with vehicle or TCS (n=3 mice per group). All genes showed in this figure had a p-adjusted value above 0.05, showing no differences between groups.



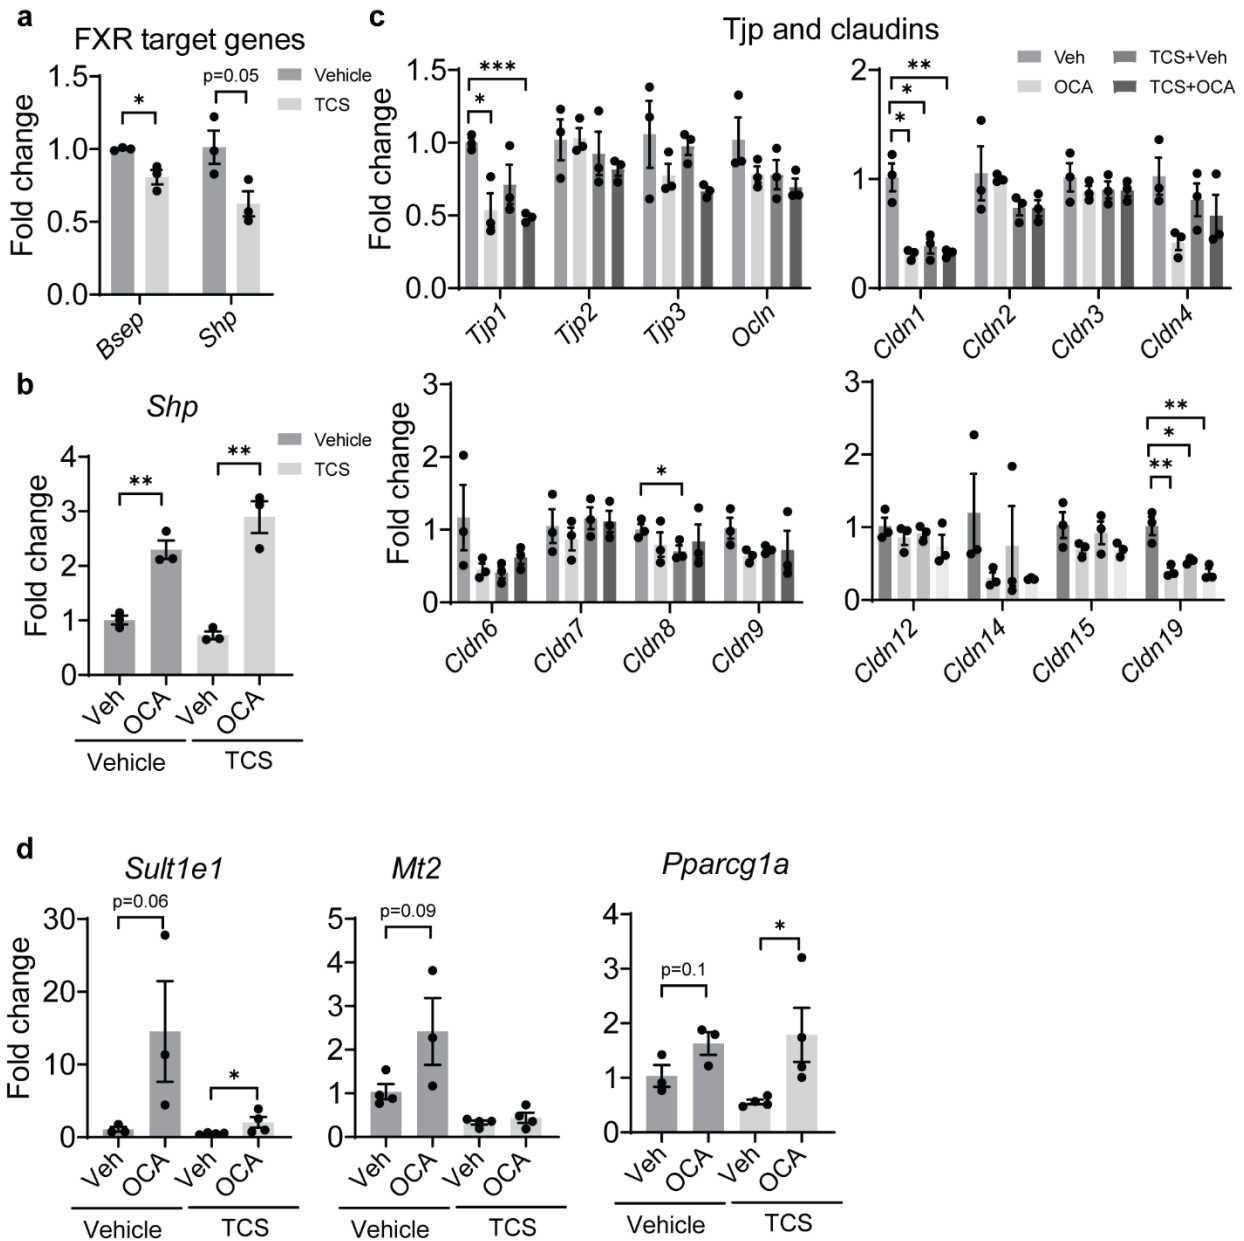

**Figure S8. OCA has no effect in intestinal barrier genes but increases GR response in liver in the absence of TCS.** WT neonatal mice breastfed with vehicle or TCS milk for 21 days and treated with vehicle or OCA. **a**, Hepatic expression of genes associated with FXR (n=3 mice per group). **b**, Intestinal expression of *Shp* (n=3 mice per group). **c**, Intestinal expression of TJPs, occludin and claudins (n=3 mice per group). **d**, Hepatic expression GR related genes (n=3-4 mice per group). **a-d** show mean  $\pm$  S.E., determined by two-tailed Student's test; \*P<0.05, \*\*P<0.01, \*\*\*P<0.001.

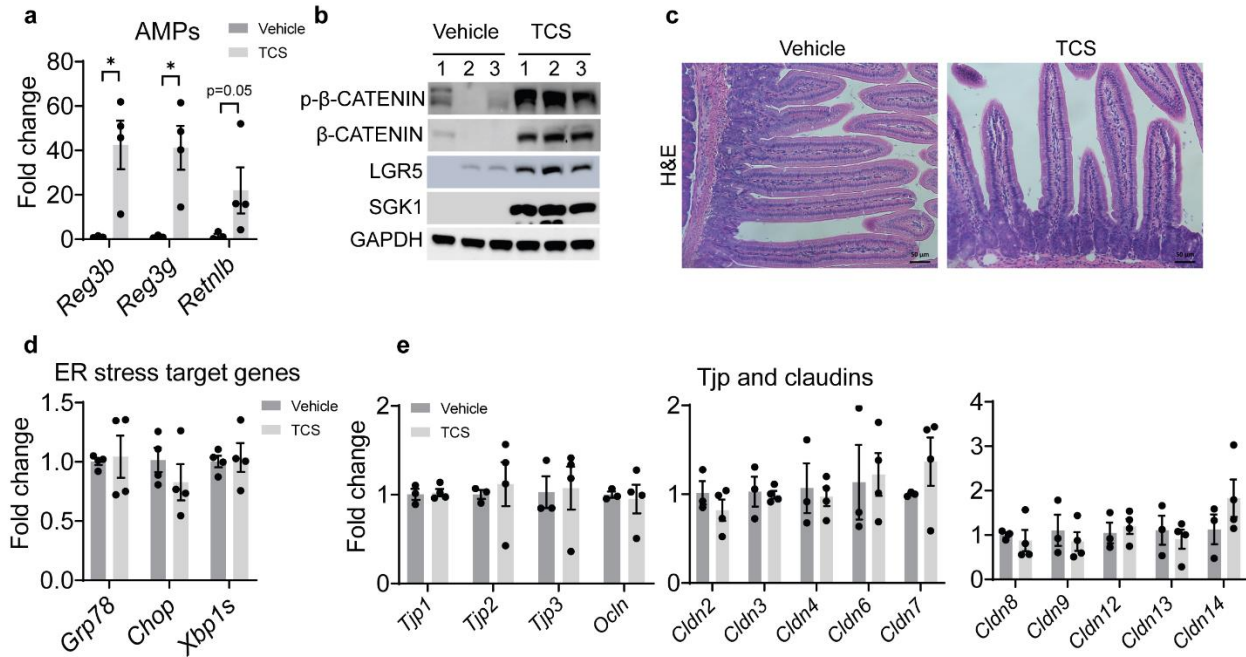

**Figure S9. TCS treatment upregulates AMPs and  $\beta$ -catenin pathway in intestines.** WT neonatal mice breastfed with vehicle or TCS milk for 21 days. **a**, Intestinal expression of *Reg3b*, *Reg3g* and *Retnlb* (n=3-4 mice per group). **b**, Intestinal IB of total and phosphorylated  $\beta$ -catenin and LGR5 and SGK1 (n=3 mice per group). **c**, Jejunum histological sections were stained with H&E (n=3 per group), Scale bars=50 $\mu$ m. **d**, Intestinal expression of genes associated with ER stress (n=4 mice per group). **e**, Intestinal TJP and claudins genes (n=3 mice per group). **a**, **d** and **e** show mean  $\pm$  S.E., determined by two-tailed Student's test; \*P<0.05.

**Table**

**Table S1. NAFLD semi-quantitative score in neonatal mice breastfed with TCS, according to Brunt (Brunt, E.M. Nonalcoholic steatohepatitis: pathologic features and differential diagnosis. *Semin Diagn Pathol* **22**, 330-338, 2005)**

| <b>Histopathology</b> | <b>Vehicle</b> | <b>TCS</b> |
|-----------------------|----------------|------------|
| Steatosis             | 0              | 1          |
| Inflammation          | 0              | 1          |
| Fibrosis              | 0              | 1          |
| Balloning             | 0              | 0          |
| Necrosis              | -              | -          |
| <b>Total score</b>    | <b>0</b>       | <b>3</b>   |

**Steatosis:** hepatocytes exhibiting macro/microvacuolization, 0 (<5%); 1 (5-33%); 2 (33-66%); 4 (>66%). **Inflammation:** foci per 200x field, 0 (no foci); 1 (<2 foci per field); 2 (2-4 foci per field); 3 (>4 foci per field). **Fibrosis:** 0 (none); 1 (mild); 2 (moderate); 3 (severe); 4 (cirrhosis). **Ballooning:** 0 (none); 1 (few balloon cells); 2 (many balloon cells). **Necrosis:** not reported in NAFLD.

**Table S2.** Primer sequences used for Reverse Transcription Quantitative-PCR (RT-qPCR).

| <b>Gene name</b>    | <b>Forward (5' - 3')</b>  | <b>Reverse (5' - 3')</b>  |
|---------------------|---------------------------|---------------------------|
| <i>Acaca</i>        | TTCCACGTAGGAGGAGCTTCC     | CCTCCGGTGCCTTCTCATTAC     |
| <i>Acly</i>         | CTGTGCCACCATGTTCTCCTC     | AGGCCTGGTTCTTGGCTACTG     |
| <i>Atf4</i>         | TTGTCCGTTACAGCAACACTG     | GCAGCAGCACCAGGCTCT        |
| <i>Bsep</i>         | AAGGACAGCCACACCAACTC      | CCAGAACATGACAAACGGAA      |
| <i>Ccne1</i>        | TTGCAAGACCCAGATGAAGA      | TCCACGCATGCTGAATTATC      |
| <i>Cldn1</i>        | ATCACCTTCGGGAGCTCAGGT     | TGATGGGGGTCAAGGGGTCAT     |
| <i>Cldn2</i>        | ATGCCTTCTTGAGCCTGCTT      | CAGTGTCTCTGGCAAGCTGA      |
| <i>Cldn3</i>        | CGTACCGTCACCACTACCAG      | CAGCCTAGCAAGCAGACTGT      |
| <i>Cldn4</i>        | CCATGGAACCCTTCCGTTGA      | ACCCGTCCATCCACTCTACA      |
| <i>Cldn6</i>        | CCCTTGGTGGCTGATGCTCAA     | AGGTGGAGCTTGGACTCAGGT     |
| <i>Cldn7</i>        | TGTACCTACCTGGTCCTGGG      | TCTCAGAAAAGACGGGACGC      |
| <i>Cldn8</i>        | GGAATGCCAATCCATCACGC      | CTCTTTTATCCCCAGGCCCC      |
| <i>Cldn9</i>        | AAGTGGTATGGGAGGGGCTGT     | CGCAGGTGGAAGCTTCTGGAA     |
| <i>Cldn12</i>       | TGTGTGCAGATGTGCTCCTGT     | GCAGGAGGGCTTGAGCTGTAT     |
| <i>Cldn14</i>       | CTAACCCAGAGGGCATGTGTGC    | AGTCCCATCCACCTTGATGCT     |
| <i>Cldn15</i>       | GGTGGCTATCTCGTGGTACG      | GCACTCCAGCCCAAGTAGAG      |
| <i>Cldn19</i>       | GGAATTCTTCAACCCAGCAC      | ATAGGGCTGTGGGATGCTGTT     |
| <i>Chop</i>         | CCACCACACCTGAAAGCAGAA     | AGGTGAAAGGCAGGGACTCA      |
| <i>Ctgf</i>         | CAGACTGGAGAAGCAGAGCC      | GCTTGGCGATTTTAGGTGTC      |
| <i>Cyclophiline</i> | CAGACGCCACTGTGCTT         | TGTCTTTGGAACCTTGTCTGC     |
| <i>Cyp4a14</i>      | ACCCCTCTAGATTTGCACCA      | AGCAAACCTGTTTCCCAATGC     |
| <i>Cyp4a10</i>      | CACACCCTGATCACCAACAG      | TCCTTGATGCACATTGTGGT      |
| <i>Edem1</i>        | CTACCTGCGAAGAGGCCG        | GTTTCATGAGCTGCCCACTGA     |
| <i>Ehhadh</i>       | CTATGATCCGCCTCTGCAA       | TGGCTCTAACCGTATGGTCC      |
| <i>Fabp1</i>        | TGCAGAGCCAGGAGAACTTT      | GATTTCTGACACCCCTTGA       |
| <i>Fgf21</i>        | CTCCAGCAGTTCTCTGA         | CCTGGGTGTCAAAGCCTCTA      |
| <i>Fasn</i>         | AGAAGAGCCATGGAGGAGGTG     | ATGTCCACACCACCAATGAGG     |
| <i>Grp78</i>        | TTCAGCCAATTATCAGCAAACCTCT | TTTTCTGATGTATCCTCTTACCAGT |
| <i>Mlxip1</i>       | CGGATACGGACTTGGAGGATC     | GAAGTGTCCGCTGTGGATGAC     |
| <i>Mt2</i>          | TTGCGCTCGACCCAATACTC      | CATTGTTTGCATTTGCAGGCG     |
| <i>Ocln</i>         | TCCGGATCCTGTCTATGCTCA     | ATAGCCACCTCCGTAGCCAAA     |
| <i>Perk</i>         | TCATCCAGCCTTAGCAAACC      | ATGCTTTCACGGTCTTGGTC      |

|                 |                       |                        |
|-----------------|-----------------------|------------------------|
| <i>Pparcg1a</i> | AAGTGGTGTAGCGACCAATCG | AATGAGGGCAATCCGTCTTCA  |
| <i>Reg3b</i>    | CCCAAGGGCTCCCAGGCTTA  | GAGGTGTCCTCCAGGCCTCT   |
| <i>Reg3g</i>    | TGGCGCTGAAGCTTCCTTCC  | TCATAGCCCAGTGTCTGGGTCA |
| <i>Retnlb</i>   | CCATTTCTGAGCTTTCTGG   | AGCACATCCAGTGACAACCA   |
| <i>Scd1</i>     | GCTCTACACCTGCCTCTTCG  | CAGCCGAGCCTTGTAAGTTC   |
| <i>Shp</i>      | CACGATCCTCTTCAACCCAG  | AGACTTCACACAGTGCCCA    |
| <i>Srebf1</i>   | GGCTCTGGAACAGACACTGG  | TGGTTGTTGATGAGCTGGAG   |
| <i>Sult1e1</i>  | AAACTCACCTGCCACCCAAG  | TTGGCGTTCGGCAAAGATA    |
| <i>Xbp1s</i>    | CTGAGTCCGAATCAGGTGCAG | GTCCATGGGAAGATGTTCTGG  |
| <i>Tjp1</i>     | GAAACTCTGCTGAGCCCCCTA | GTTTTAGGGTCACCCGACGAG  |
| <i>Tjp2</i>     | CGAAGCAGTCTGGGTCTCTGA | CCGGCTCCTCTAGCTCATTGT  |
| <i>Tjp3</i>     | ATGGTATGCCATTTCGGAACC | CCGGGTACAACGTGTCCACTA  |
