# Supplementary material for: Lactational delivery of Triclosan promotes non-alcoholic fatty liver disease in newborn mice
Source: PubMed Central journal article supplement (PMC9329322; doi:10.1038/s41467-022-31947-4), 2022-07-27
Supplement: 41467_2022_31947_MOESM3_ESM.pdf [file 41467_2022_31947_MOESM3_ESM.pdf]

## **Description of Additional Supplementary Files**

File Name: Supplementary Data 1

Description: For each figure and supplementary figure, exact P values for all comparisons and group size for each group are listed.
